# Supplementary material
Source: Springer Nature journal article supplement (https://www.springermedizin.de/resource/supplementary/12958_2012_987_MOESM5_ESM.pdf/9566568)

**A**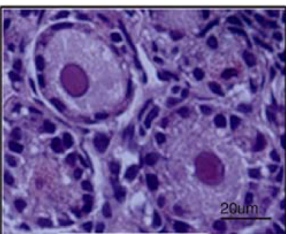**Blank control**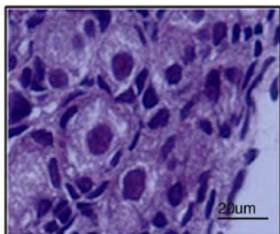**Negative control**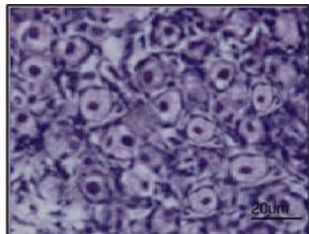**c-src siRNA****B**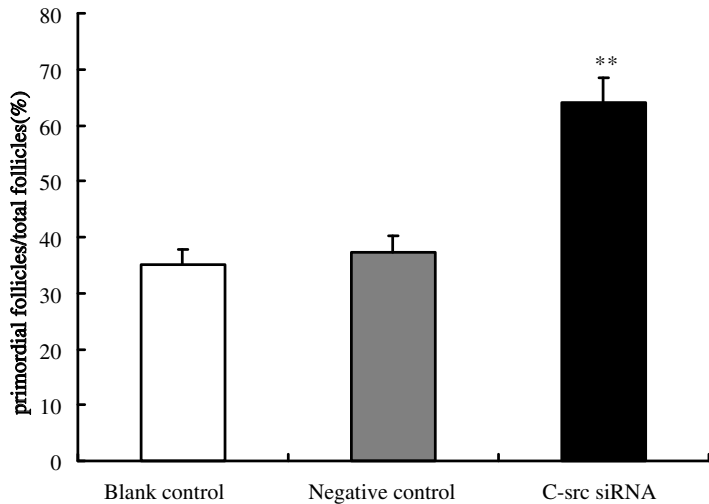

Supplement: MOESM5 [file 9566568]
